# Supplementary material
Source: PubMed Central journal article supplement (PMC4818564)
Supplement: supp_WNL.0000000000002527_Coinvestigators.pdf [file supp_WNL.0000000000002527_Coinvestigators.pdf]

## SPRINT PUBLICATIONS ACKNOWLEDGMENT

### LIST

**Study Leadership:** Paul Whelton (Chair), Karen C. Johnson (Vice-Chair), Lawrence Fine (Project Officer), Joni Snyder (Deputy Project Officer).

**Program Office: National Institutes of Health, Bethesda, Maryland:** Diane Bild (Project Scientist), Denise Bonds (Project Scientist), Nakela Cook (Project Scientist), Jeffrey Cutler (Project Scientist), Susan Czajkowski (Project Scientist), Lawrence Fine (Project Officer), Peter Kaufmann (Project Scientist), Paul Kimmel (Project Scientist), Lenore Launer (Project Scientist), Claudia Moy (Project Scientist), William Riley (Project Scientist), Laurie Ryan (Project Scientist), Joni Snyder (Deputy Project Officer), Song Yang (Biostatistician)

**SPRINT Clinical Center Networks: Case Western Reserve University, Cleveland, OH:** Alberta Bee (CCN Asst. Project Manager), Alan J Lerner (CCN MIND PI), Mahboob Rahman (CCN Co-PI), Carolyn Still (CCN Project Manager, Co-I), Alan Wiggers (Co-I), Jackson T Wright Jr (CCN PI), Renee Dancie (former CCN Project Manager); **Memphis Veteran Affairs Medical Center, Memphis, TN:** William Cushman (PI), Barry Wall (Co-I), Linda Nichols (MIND PI), Robert Burns (MIND Consultant), Jennifer Martindale-Adams (MIND Consultant), Dan Berlowitz (Economic & HRQL Consultant), Elizabeth Clark (CCN Coordinator), Sandy Walsh (CCN Coordinator) Terry Geraci (CCN Coordinator) Carol Huff (Budget Analyst), Linda Shaw (CCN Research Assistant). **University of Alabama, Birmingham, AL:** Suzanne Oparil (PI), Cora E. Lewis (Co-PI), Virginia Bradley (MIND Co-I), David Calhoun (Co-I), Stephen Glasser (Co-I), Kim Jenkins (CCN Coordinator), Tom Ramsey (CCN Coordinator); **University of Utah, Salt Lake City, UT:** Alfred K. Cheung (PI), Srinivasan Beddhu (Co-I), Gordon Chelune (MIND Co-I), Jeffrey Childs (Associate Director of Operations), Lisa Gren (Director of Operations), Anne Randall (CCN Coordinator); **Wake Forest University Health Sciences, Winston-Salem, NC:** Michael Rocco (PI), David Goff (Co-PI), Carlos Rodriguez (Co-I), Laura Coker (Co-I), Amret Hawfield (Co-I), Joseph Yeboah (Co-I), Lenore Crago (CCN Coordinator) John Summerson (CCN Coordinator), Anita Hege (MIND Coordinator).

**SPRINT Central Coordinating Center: Wake Forest University Health Sciences, Winston-Salem, NC:** David Reboussin (PI), Jeff Williamson (Co-PI), Walter Ambrosius (Co-I), William Applegate (Co-I), Greg Evans (Co-I), Capri Foy (Co-I), Barry Freedman (Co-I), Dalane Kitzman (Co-I), Nick Pajewski (Co-I), Steve Rapp (Co-I), Scott Rushing (Co-I), Neel Shah (Co-I), Mara Vitols (Co-I), Lynne Wagenknecht (Co-I), Valerie Wilson (Co-I), Kaycee M. Sink (Safety Officer), Brenda Craven (Program Director), Tim Craven (Biostatistician), Katelyn Garcia (Biostatistician), Sarah Gaussoin (Biostatistician), Laura Lovato (Biostatistician), Jill Newman (Biostatistician), Bobby Amoroso (Programmer), Jason Griffin (Programmer), Darrin Harris (Programmer), Mark King (Programmer), Kathy Lane (Programmer), Debbie Steinberg (Programmer), Donna Ashford (Project Manager), Loretta Cloud (Project Manager), Debbie Felton (Project Manager), Marjorie Howard (Project Manager), Pamela Nance (Project Manager), Letitia Perdue (Project Manager), Nicole Puccinelli-Ortega (Project Manager), Laurie Russell (Project Manager), Jennifer Walker (Project Manager), Nancy Woolard (Project Manager)

**SPRINT Central Laboratory: University of Minnesota Advanced Research and Diagnostic Laboratory:** Anthony A. Killeen (PI), Anna M. Lukkari (coordinator). **Acknowledgement statement:** This project was supported by Award Number **N01-HC-95240**. The content is solely the responsibility of the author and does not reflect the official views of the NHLBI.

**SPRINT Drug Distribution Center: VA Cooperative Studies Program Clinical Research Pharmacy Coordinating Center:** Robert Ringer (PI), Brandi Dillard (coordinator), Stuart Warren (Co-I), Mike Sather (PI), James Pontzer (coordinator), Zach Taylor (coordinator).

**SPRINT ECG Reading Center: Epidemiological Cardiology Research Center (EPICARE), Winston Salem, NC:** Elsayed Z Soliman (PI), Zhu-Ming Zhang (Co-I), Yabing Li (coordinator), Chuck Campbell (coordinator), Susan Hensley (coordinator), Julie Hu (coordinator), Lisa Keasler (coordinator), Mary Barr (coordinator), Tonya Taylor (coordinator)

**SPRINT MRI Reading Center: University of Pennsylvania-Philadelphia, PA:** R. Nick Bryan (PI), Christos Davatzikos (Co-I), Ilya Nasarallah (Co-I), Lisa Desiderio (Project Manager), Mark Elliott (MRI Physicist), Ari Borthakur (MRI Physicist), Harsha Battapady (Data Analyst), Guray Erus ( Postdoctoral Fellow), Alex Smith (Postdoctoral Fellow), Ze Wang (Research Associate), Jimit Doshi (Data Analyst). **SPRINT MRI by site: University of Pennsylvania-Philadelphia, PA:** Raymond Townsend (Clinic PI), Debbie Cohen (Co-I), Yonghong Huan (Co-I), Mark Duckworth (Research Coordinator), Virginia Ford (Research Coordinator), Kelly Sexton (MRI Coordinator). **University Hospital Case Medical Center-Cleveland, OH:** Jackson T. Wright, Jr. (PI), Alan Lerner (Co-I), Mahboob Rahman (Co-I), Carolyn Still (Project Manager), Alberta Bee (Research Coordinator), Debra Lee Stokes, (MRI coordinator), Shonte Smith (MRI coordinator), Jeffrey Sunshine (Site Radiologist), Mark Clampitt (MRI Technologist). **Vanderbilt University:** Seth Smith (MRI Director), Brian Welch (MRI Research Manager), Manus Donahue ( MRI Physicist), Alex Dagley (Researcher Coordinator), Dave Pennell (MRI Technologist), Chris Cannistraci (Imaging Research Specialist), Kristin Merkle (MRI Research Coordinator), Julie Lewis (Clinic PI) Mohammed Sika (Research Coordinator). **University of Miami:** Clinton Wright (Co-I), Mohammad Sabati (MRI Director), Edward Campuzano (Chief MRI Technologist), Hector Martin (MRI Technologist), Andrea Roman (MRI Technologist), Jesus Cruz (MRI Technologist), Natalya Nagornaya (Site Radiologist). **Wake Forest University:** Laura Coker (Co-I), Anita Hege (Project Coordinator), Joseph Maldjian (Site Radiologist), Sandra Kaminsky (MRI Technologist), Debra Fuller (MRI Technologist), Youngkoo Jung (MRI Physicist). **University of Alabama at Birmingham:** Suzanne Oparil (Network PI), Beth Lewis (Co-PI), Virginia Wadley (MIND Co-I), Kim Jenkins (Project Coordinator), Tom Ramsey (Project Coordinator), William Evanochko (MRI Physicist), Glenn Roberson (Site Radiologist), Trina Corbitt (MRI Technologist), William Fisher (MRI Technologist), Cathy Clements (MRI Technologist). **Boston University:** Daniel Weiner (Clinic PI), Andrew Wells (Research Coordinator), Amanda Civileto (Research Coordinator), Gerard P. Aurigemma (Clinic PI), Noelle Bodkin (Research Coordinator), Alex Norbash (Co-I,) Margaret Lavoye (Research Administrator), Andrew Ellison (MRI Technologist), Ronald Killiany (Imaging Center Director), Osama Sakai (Site Radiologist).

**SPRINT Sub-Committee Chairs: Ancillary Science:** Alfred Cheung, **Design and Analysis:** Walter Ambrosius, **Economic Evaluation/Health Related Quality of Life:** Dan Berlowitz, **Intervention:** William Cushman, **Measurements, Procedures and Quality Control:** Beth Lewis, **Mortality and Morbidity:** Suzanne Oparil, **Presentations and Publications:** Jackson T. Wright, Jr., **Recruitment, Retention and Adherence:** David Goff, **Safety:** Kaycee Sink, **SPRINT MIND:** Jeff Williamson.

**SPRINT Clinical Centers by Network: OHIO Network: Cleveland Clinic Foundation-Cleveland, OH:** George Thomas (PI), (Co-PI), Martin Schreiber, Jr (Co-I), Sankar Dass Navaneethan (Co-I), John Hickner (Co-I), Michael Lioudis (Co-I), Susan Marczewski (coordinator), Jennifer Maraschky (coordinator), Martha Colman (coordinator) Andrea Ababy (coordinator). **Louis Stokes Cleveland VA Medical Center-Cleveland, OH:** Mahboob Rahman (PI), Paul Draws (Co-I), Denise Kresevic (Co-I), Pratibha P. Raghavendra (Co-I), Scott Ober (Co-I), Ronda Mourad (Co-I), Lisa Tucker (coordinator), Bill Schwing (coordinator). **MetroHealth Medical Center-Cleveland, OH:** John Sedor (PI), Edward J. Horwitz (Co-PI), Jeffery Schelling (Co-I), Lisa Humbert (coordinator), Wendy Tutolo (coordinator). **North East Ohio Neighborhood Health Center-Cleveland, OH:** Suzanne White (PI), Robin Hughes (coordinator). **University Hospital Case Medical Center-Cleveland, OH:** Jackson T. Wright, Jr. (PI), Mirela Dobre (CoPI), Carolyn H. Still (Co-I), Alberta Bee (coordinator), Monique Williams (coordinator). **The Ohio State University Medical Center, Division of Nephrology and Hypertension-Columbus, OH:** Udayan Bhatt (PI), Anil Agarwal (Co-PI), Melissa Brown (coordinator), Nicole Ford (coordinator), Cynthia Stratton (coordinator), Jody Baxter (coordinator), Alicia A. Lykins (coordinator), Alison McKinley Neal (coordinator) Leena Hirmath (coordinator). **The Ohio State University Medical Center, Division of Endocrine, Diabetes, and Metabolism-Columbus, OH:** Osei Kwame (PI), William F. Miser (Co-PI), Colleen Sagrilla (coordinator), Jan Johnston (coordinator), Amber Anaya (coordinator) Kelly Rogers (Coordinator). **University Hospitals Landerbrook Health Center-Mayfield Height, OH:** Donald Ebersbacher (PI), Lucy Long (coordinator), Beth Bednarchik (coordinator). **University Hospitals Glenridge Office Park-North Royalton, OH:** Alan Wiggers (PI), Lucy Long (coordinator). **University Hospitals Suburban Health-Cleveland, OH:** Adrian Schnell (PI), Jonathan Smith (coordinator), Lori Peysha (coordinator). **University Hospitals Otis Moss Jr. Health Center-Cleveland, OH:** Carla Harwell (PI), Pinkie Ellington (coordinator). **SUNY Downstate Medical College-Brooklyn, New York:** Mary Ann Banerji (PI), Pranav Ghody (Co-I), Melissa Vahudeh Rambaud (coordinator). **University of Pennsylvania-Philadelphia, PA:** Raymond Townsend (PI), Debbie Cohen (Co-I), Yonghong Huan (Co-I), Mark Duckworth (coordinator), Virginia Ford (coordinator), Juliet Leshner (coordinator), Vander Veen, Sarah (coordinator). **Temple University-Philadelphia, PA:** Crystal.Gadegbeku (PI), Avi Gillespie (Co-I), Sandra Amoroso (coordinator), Zoe Pfeffer (coordinator). **Tulane University-New Orleans, LA:** Jiang He (PI), Jing Chen (Co-I), Eva Lustigova (coordinator), Jackie Dolan (coordinator), Lanie Sansing (coordinator), Erin Malone (coordinator), Bernadette Borja (coordinator). **Ochsner Clinic Foundation-New Orleans, LA:** Marie Krousel-Wood (PI), Richard Deichmann (Co-I), Patricia Ronney (Co-I), Susan Muery (coordinator), Donnalee Trapani (coordinator). **CWRU CCN Publication Acknowledgements: CWRU:** This publication was made possible by the Clinical and Translational Science Collaborative of Cleveland, **UL1TR000439** from the National Center for Advancing Translational Sciences (NCATS) component of the National Institutes of Health and NIH roadmap for Medical

Research. Its contents are solely the responsibility of the authors and do not necessarily represent the official views of the NIH. **OSU:** The project described was supported by Award Number **UL1RR025755** from the National Center for Research Resources. The content is solely the responsibility of the authors and does not necessarily represent the official views of the National Center for Research Resources or the National Institutes of Health. **U Penn:** The project described was supported by the National Center for Research Resources, Grant UL1RR024134, and is now at the National Center for Advancing Translational Sciences, **Grant UL1TR000003**. The content is solely the responsibility of the authors and does not necessarily represent the official views of the NIH. **SOUTHEAST Network: Georgia Regents University, Augusta, GA:** Matt Diamond (PI), Laura Mulloy (PI), Heather Anderson, (coordinator), Emily Stone (coordinator), Walida Walker (coordinator), Charlene Weathers (coordinator). **Carolinas Medical Center, Charlotte, NC:** Andrew McWilliams (PI), Michael Dulin (co-I), Lindsay Kuhn (Co-PI), Susan Standridge (coordinator), Kelly Preston (coordinator), Susan Norton (coordinator), Silena Gaines (coordinator). **University of South Carolina, Columbia, SC:** Ali A. Rizvi (PI), Andrew W. Sides (Co-PI), Matthew M. Hix (coordinator), Philip Hutchinson (coordinator), Joseph Espiritu (coordinator). **Duke University, Durham, NC:** Mark Feinglos (PI), Eugene Kovalik (Co-PI), Georgianne Gedon-Lipscomb (coordinator), Kathryn Evans (coordinator), MaryAnn Mason (coordinator), Ronna Zimmer (coordinator), Mary Furst (coordinator). **East Carolina University, Greenville, NC:** James Powell (PI), Paul Bolin (Co-PI), Junhong Zhang (Co-PI), Presley Phelps (coordinator), Connie Garris-Sutton (coordinator), Beatrice Atkinson (coordinator), Winifred Bryant (coordinator). **University of Miami, Miami, FL:** Gabriele Contreras (PI), Maritza Suarez (Co-PI), Ivonne Schulman (Co-PI), Don Koggan (coordinator), Jackie Vassallo (coordinator), Gloria Peruyera (coordinator). **Wake Forest Nephrology, Winston Salem, NC:** Michael Rocco (PI), Amret Hawfield (Co-PI), Cassandra Bethea (coordinator), Laura Gilliam (coordinator). **Wake Forest Downtown Health Plaza, Winston Salem, NC:** Carolyn Pedley (PI), Geraldine Zurek (coordinator), Miriam Baird (coordinator), Mary Martha Smoak (coordinator). **Wake Forest Geriatrics, Winston Salem, NC:** Julie Williams (PI), Samantha Rogers (Co-PI), Lindsay Gordon (coordinator), Jessica McCorkle-Doomy (coordinator), Erin Kennedy (coordinator), Jonathan Adams (coordinator), Dana Chamberlain (coordinator). **University of South Florida, Tampa, FL:** Ramon Lopez (PI), Juris Janavs (coordinator). **Emory University, Atlanta, GA:** Arlene Chapman (PI), Allen Dollar (Co-PI), Olubunmi Williams (coordinator), Yoosun Han (coordinator). **The Mayo Clinic Jacksonville, Jacksonville, FL:** William Haley (PI), Peter Fitzpatrick (Co-PI), Joseph Blackshear (Co-PI), Brian Shapiro (Co-PI), Ashley Johnson (coordinator), Heath Gonzalez (coordinator), Anna Harrell (coordinator), Jermain Robinson (coordinator). **Miami VA, Miami, FL:** Leonardo Tamariz (PI), Ivonne Schulman (Co-PI), Jennifer Denizard (coordinator), Dhurga Krishnamoorthy (coordinator). **Pennington Biomedical Research, Baton Rouge, LA:** Frank Greenway (PI), Timothy Church (PI), Chelsea Hendrick (coordinator), Aimee Yoches (coordinator), Leighanne Sones (coordinator), Markee Baltazar (coordinator). **Morehouse School of Medicine, Atlanta, GA:** Priscilla Pemu (PI), Connie Jones (coordinator), Derrick Akpalu (coordinator). **UTAH Network: Boston University Medical Center, Boston MA:** Laura Dember (PI), Denise Soares (coordinator). **Henry Ford Hospital, Detroit MI:** Jerry Yee (PI), Kausik Umanath (Co-PI), Naima Ogletree (Sub-I), Schawana Thaxton (Sub-I), Karen Campana (coordinator), Dayna Sheldon (coordinator), Krista MacArthur (coordinator). **Intermountain Health Care, Salt Lake City UT:** J. Brent Muhlestein (PI), Nathan Allred (Co-I), Brian Clements (Co-I), Ritesh Dhar (Co-I),

Kent Meredith (Co-I), Viet Le (Co-I), Edward Miner (Co-I), James Orford (Co-I), Erik R. Riessen (Co-I), Becca Ballantyne (coordinator), Ben Chisum (coordinator), Kevin Johnson (coordinator), Dixie Peeler (coordinator). **Stanford University, Palo Alto CA:** Glenn Chertow (PI), Manju Tamura (Co-PI), Tara Chang (Co-I), Kevin Erickson (Co-I), Jenny Shen (Co-I), Randall S. Stafford (Co-I), Gregory Zaharchuk (Co-I), Margareth Del Cid (coordinator), Michelle Dentinger (coordinator), Jennifer Sabino (coordinator), Rukmani Sahay (coordinator), Ekaterina (Katie) Telminova (coordinator). **Tufts Medical Center, Boston MA:** Daniel E. Weiner (PI), Mark Sarnak (Co-I), Lily Chan (coordinator), Amanda Civiletto (coordinator), Alyson Heath (coordinator), Amy Kantor (coordinator), Priyanka Jain (coordinator), Bethany Kirkpatrick (coordinator), Andrew Well (coordinator), Barry Yuen (coordinator). **University of Colorado, Denver, Denver CO:** Michel Chonchol (PI), Beverly Farmer (coordinator), Heather Farmer (coordinator), Carol Greenwald (coordinator), Mikaela Malaczewski (coordinator). **University of Illinois, Chicago, Chicago IL:** James Lash (PI), Anna Porter (Co-I), Ana Ricardo (Co-I), Robert T. Rosman (Co-I), Janet Cohan (coordinator), Nieves Lopez Barrera (coordinator), Daniel Meslar (coordinator), Patricia Meslar (coordinator). **University of Pittsburgh, Pittsburgh PA:** Margaret (Molly) Conroy (PI), Mark Unruh (PI), Rachel Hess (Co-PI), Manisha Jhamb (Co-I), Holly Thomas (Co-I), Pam Fazio (coordinator), Elle Klixbull (coordinator), Melissa Komlos-Weimer (coordinator), LeeAnne Mandich (coordinator), Tina Vita (coordinator). **University of Texas Southwestern, Dallas TX:** Robert Toto (PI), Peter Van Buren (Co-I), Julia Inrig (Co-I), Martha Cruz (coordinator), Tammy Lightfoot (coordinator), Nancy Wang (coordinator), Lori Webster (coordinator). **University of Utah, Salt Lake City UT:** Srinivasan Beddhu (PI), Kalani Raphael (Co-I), Barry Stults (Co-I), Tahir Zaman (Co-I), Debra Simmons (Co-I), Tooran Lavasani (nurse practitioner), Rebecca Filipowicz (Sr. research analyst), Guo Wei (Sr research analyst), Gracie Mary Miller (coordinator), Jenice Harerra (coordinator), Jeff Christensen (Clinical research assistant), Ajay Giri (Clinical research assistant), Xiaorui Chen (graduate research assistant), Natalie Anderton (graduate research assistant), Arianna Jensen (undergraduate research assistant). **Vanderbilt University, Nashville TN:** Julia Lewis (PI), Anna Burgner (Co-I), Jamie P. Dwyer (Co-I), Gerald Schulman (Co-I), Terri Herrud (coordinator), Ewanda Leavell (coordinator), Tiffany McCray (coordinator), Edwina McNeil-Simaan (coordinator), Munmun Poudel (coordinator), Malia Reed (coordinator), Mohammed Sika (coordinator), Delia Woods (coordinator), Janice L. Zirkenbach (coordinator). **George Washington University, Washington DC:** Dominic S. Raj (PI), Scott Cohen (Co-I), Samir Patel (Co-I), Manuel Velasquez (Co-I), Roshni S. Bastian (coordinator), Maria Wing (coordinator) Akshay Roy-Chaudhury (Coordinator). **University of California, Davis, Sacramento CA:** Thomas Depner (PI), Lorien Dalrymple (Co-I), George Kaysen (Co-I), Susan Anderson (coordinator). **Salt Lake City VA, Salt Lake City UT:** Srinivasan Beddhu (PI), John Nord (Co-I), Debra Simmons (Co-I), Gracie Mary Miller (coordinator), Jenice Harerra (coordinator), Ajay Giri (Clinical research assistant). **Veterans Medical Research Foundation, San Diego CA:** Joachim H. Ix (PI), Leonard Goldenstein (Co-PI), Cynthia M. Miracle (Co-I), Nketi Forbang (coordinator), Maja Mircic (coordinator), Brenda Thomas (coordinator), Tiffany Tran (coordinator). **UCLA, Los Angeles CA:** Anjay Rastogi (PI), Mihae Kim (Sub-PI), Mohamad Rashid (Co-PI), Bianca Lizarraga (coordinator), Amy Hocza (coordinator), Kristine Sarmosyan (coordinator), Jason Norris (coordinator), Tushar Sharma (coordinator), Amanda Chioy (coordinator), Eric Bernard (coordinator), Eleanore Cabrera (coordinator), Christina Lopez (coordinator), Susana Nunez (coordinator), Joseph Riad (coordinator), Suzanne Schweitzer (coordinator), Siran Sirop (coordinator), Sarah Thomas (coordinator), Lauren Wada

(coordinator). **Loyola University Medical Center, Chicago IL:** Holly Kramer (PI), Vinod Bansal (Co-PI), Corliss E. Taylor (coordinator). **University of Florida, Gainesville FL:** Mark S. Segal (PI), Karen L. Hall (Co-I), Amir Kazory (Co-I), Lesa Gilbert (coordinator), Linda Owens (coordinator), Danielle Poulton (coordinator), Elaine Whidden (coordinator). **University of Michigan, Ann Arbor MI:** Caroline Blaum (PI), Jocelyn (Jo) Wiggins (PI), Tanya Gure (Co-I), Linda Nyquist (Co-I), Eileen Robinson (coordinator). **UTAH CCN Publication Acknowledgments: Boston:** The trial was supported by a CTSA grant **UL1 RR025771**. **Stanford:** Spectrum is part of the Clinical and Translational Science Award (CTSA) program, funded by the National Center for Advancing Translational Sciences (Grant: **UL1 TR000093**) at the National Institutes of Health (NIH). All publications resulting from the use of Spectrum resources must cite this grant number. **Tufts:** The project described was supported by the National Center for Research Resources Grant Number **UL1RR025752** and the National Center for Advancing Translational Sciences, National Institutes of Health, Grant Numbers **UL1 TR000073** and **UL1 TR001064**. The content is solely the responsibility of the authors and does not necessarily represent the official views of the NIH. **University of Illinois:** The project described was supported by Grant number **UL1TR000050**, Clinical Interface Core. **UT Southwestern:** The current CTSA grant number is **9U54TR000017-06**. University of Texas Southwestern Clinical and Translational Alliance for Research. **University of Utah:** CTSA Grant number is **UL1TR000105-05**. Center for Clinical and Translational Science. **Vanderbilt University:** Research reported in this publication was supported by the National Center for Advancing Translational Sciences of the National Institute of Health under Award Number **UL1 TR000445**. The content is solely the responsibility of the authors and does not necessarily represent the official views of the National Institutes of Health. Vanderbilt Institute for Clinical and Translational Research (VICTR). **University of CA, Davis:** CTSA Grant number **UL1 TR000002**. National Center for Advancing Translational Sciences. **University of Florida:** This work is supported in part by the NIH/NCATS Clinical and Translational Science Award to the University of Florida, Award Number **UL1 TR000064**; UF Clinical Research Center (UF CRC). **University of Michigan:** This work is supported in part by the Michigan Institute for Clinical and Health Research, Award Number **UL1TR000433**. **UAB Network: Athens Internal Medicine, Athens, AL:** Nauman Qureshi (PI), Karen Ferguson (coordinator), Sumrah Haider (coordinator), Mandy James (coordinator), Christy Jones (coordinator), Kim Renfroe (coordinator), April Seay (coordinator), Carrie Weigart (coordinator). **UAB - The Chronic Kidney Disease Clinic, Birmingham, AL:** Denyse Thornley-Brown (PI), Dana Rizik (Co-I), Bari Cotton (coordinator), Meredith Fitz-Gerald (coordinator), Tiffany Grimes (coordinator), Carolyn Johnson (coordinator), Sara Kennedy (coordinator), Chanel Mason (coordinator), Lesa Rosato-Burson (coordinator), Robin Willingham (coordinator). **UAB - Vascular Biology and Hypertension Clinic, Birmingham, AL:** David Calhoun (PI), Eric Judd (Co-I), Tonya Breaux-Shropshire (coordinator), Felice Cook (coordinator), Julia Medina (coordinator). **Nephrology Associates, P.C., Birmingham, AL:** James Lewis (PI), Roman Brantley (Co-I), John Brouillette (Co-I), Jeffrey Glaze (Co-I), Stephanie Hall (Co-I), Nancy Hiott (Co-I), David Tharpe (Co-I), Spencer Boddy (coordinator), Catherine Mack (coordinator). **University of Tennessee Health Science Center, Memphis, TN:** Karen C. Johnson (PI) Catherine Womack (Co -I), Beate Griffin (coordinator), Carol Hendrix (coordinator), Karen Johnson (coordinator), Lisa Jones (coordinator), Chelsea Towers (coordinator). **Punzi Medical Center and Trinity Hypertension Research, Carrollton, TX:** Henry Punzi (PI), Kathy Cassidy (coordinator), Kristin Schumacher (coordinator). **Family Care**

**Practice, Fajardo, Puerto Rico:** Carmen Irizarry (PI), Ilma Colon (coordinator). **Centro Cardiovascular de Caguas, El Verde, Caguas, Puerto Rico:** Pedro Colon-Ortiz (PI), Pedro Colon-Hernandez (Co-I), Merari Carrasquillo (coordinator), Nivea Vazquez (coordinator). **Miguel Sosa-Padilla, Private Practice San Juan, Puerto Rico:** Miguel Sosa-Padilla (PI), Alex Cintron-Pinero (Co-I), Mayra Ayala (coordinator), Olga Pacheco (coordinator), Catalina Rivera (coordinator) Irma Sotomayor-Gonzalez (coordinator). **Altamira Family Practice and Research Institute Center, San Juan, Puerto Rico:** Jamie Claudio (PI), Jose Lazaro (coordinator), Migdalia Arce (coordinator), Lourdes Heres (coordinator), Alba Perez (coordinator). **Centro Clinico San Patricio, San Juan, Puerto Rico:** Jose Tavarez-Valle (PI), Ferlinda Arocho (coordinator), Mercedes Torres (coordinator), Melvaliz Vazquez (coordinator). **University of Massachusetts – Worcester, MA:** Gerard P. Aurigemma (PI), Rebecca Takis-Smith (Co-I), Julia Andrieni (Co-I), Noelle Bodkin (coordinator), Kiran Chaudhary (coordinator), Paula Hu (coordinator). **Rutgers-Robert Wood Johnson Medical School, New Brunswick, New Jersey:** John Kostis (PI), Nora Cosgrove (coordinator), Denise Bankowski (coordinator), Monica Boleyn (coordinator), Laurie Casazza (coordinator), Victoria Giresi (coordinator), Tosha Patel (coordinator), Erin Squindo (coordinator), Yan Wu (coordinator). **University of Mississippi Medical Center CRP – Jackson, MS:** Marion Wofford (PI), Michael Flessner (Co-I), Cathy Adair (coordinator). **Nashville Medical Group, Nashville, TN:** Jordan Asher (PI), Debbie Loope (coordinator), Rita Cobb (coordinator), Reiner Venegas (coordinator). **New York Irving Pavilion Research, Columbia University, New York, NY:** Thomas Bigger (Director), Daniel Donovan (PI), Carlos Lopez-Jimenez (Co-I), Amilcar Tirado (coordinator). **New York, Irving Pavilion Research Unit – CTSA Satellite, Columbia University, New York, NY:** Thomas Bigger (Director), Asqual Getaneh (PI), Rocky Tang (coordinator), Sabrina Durant (coordinator). **Clinical Cardiovascular Research Lab for the Elderly, Columbia University, New York, NY:** Thomas Bigger (Director), Mathew Maurer (PI), Sergio Teruya (Co-I) Stephen Helmke (coordinator), Julissa Alvarez (coordinator). **Medical University of South Carolina Nephrology, Charleston, SC:** Ruth Campbell (PI), Roberto Pisoni (Co-I), Rachel Sturdivant (Co-I), Caroline Counts (coordinator), Vickie Hunt (coordinator), Lori Spillers (coordinator). **Great Lakes Medical Research, Westfield, NY:** Donald Brautigam (PI), Timothy Kitchen (Co-I), Timothy Gorman (Co-I) Jessica Sayers (coordinator), Sarah Button (coordinator), June Chiarot (coordinator), Rosemary Fischer (coordinator), Melissa Lyon (coordinator), Maria Resnick (coordinator). **New Mexico VA Healthcare System – Albuquerque, NM:** Karen Servilla (PI), Darlene Vigil (Co-I), Terry Barrett (coordinator), Mary Meyers (coordinator). **Atlanta VAMC – Atlanta GA:** Mary Ellen Sweeney (PI), Rebecca Johnson (Co-I), Susan McConnell (Co-I), Khadijeh Shahid Salles (Co-I), Francoise Watson (Co-I), Maxine Maher (coordinator), Cheryl Schenk (coordinator), Laura Whittington (coordinator). **VA Boston Healthcare System – Jamaica Plain, MA:** Stephen Swartz (PI), Paul Conlin (Co-I), Jonathan Williams (Co-I), George Alexis (coordinator), Helen Gomes (coordinator), Rebecca Lamkin (coordinator). **James J. Peters VAMC – Bronx, NY:** Clive Rosendorff (PI), Stephen Atlas (Co-I), Nisharahmed Kherada (Co-I), Waddy Gonzalez (Co-I), Samih Barcham (coordinator). **Ralph H. Johnson VAMC – Charleston, SC:** Joseph John (PI), Shakaib Rehman (PI), Jan Basile (Co-I), Michael Kagan (Co-I), Hadi Baig (coordinator), Deborah Ham (coordinator). **Dayton VAMC – Dayton, OH:** Mohammed Saklayen (PI), Jason Yap (Co-I), Carol Miller (coordinator), Helen Neff (coordinator). **John D. Dingell VAMC – Detroit, MI:** Saib Gappy (PI), Arathi Raman (Co-I), Shiva Rau (Co-I), Vicki Berchou (coordinator), Elizabeth Jones (coordinator), Erin Olgren (coordinator). **VA New Jersey Healthcare System – East**

**Orange, NJ:** Sithiporn Sastrasinh (PI), Jessica Fiore (coordinator), Marianne Kutza (coordinator). **Malcom Randall VAMC – Gainesville, FL:** Ronald Shorr (PI), Anthony Bavry (Co-I), Rattana Mount (Co-I), Mark Segal (Co-I), Jeremy Thoms (Co-I), Denise Waddell (Co-I), Helen Dunn (coordinator), Jessica Hunter (coordinator), Susan Stinson (coordinator). **Michael E. DeBakey VAMC – Houston, TX:** Addison Taylor (PI), Jeffery Bates (Co-I), Jennifer Cowart, (Co-I), Shawn Ragbir (Co-I), Catherine Anderson (coordinator), Charlyne Wright (coordinator). **G.V. (Sonny) Montgomery VAMC – Jackson, MS:** Kent Kirchner (PI), Jodi Stubbs (Co-I), Ardell Hinton (coordinator), Anita (Kaye) Spencer (coordinator). **Kansas City VAMC – Kansas City, MO:** Santosh Sharma (PI), Thomas Wiegmann (PI), Archana Goel (Co-I), Amina Khan (Co-I), Virginia Savin (Co-I), Smita Mehta (coordinator). **John L. McClellan Memorial Veterans Hospital – Little Rock, AR:** Michelle Krause (PI), Debra Simmons (PI), Karl Straub (Co-I), Kate Dishongh (coordinator). **Memphis VAMC – Memphis, TN:** Barry Wall (PI), Jaya Adabala, (Co-I), Richard Childress (Co-I), William Cushman (Co-I), Geeta Gyamlani (Co-I), Atossa Niakan (Co-I), Cathy Thompson (Co-I), Janelle Moody (coordinator). **Clement J. Zablocki VAMC – Milwaukee, WI:** Jeffrey Whittle (PI), Gary Barnas (Co-I), Dawn Wolfgram, (Co-I), Heidi Cortese (coordinator). **Nashville VAMC/TVHS-GRECC – Nashville, TN:** Christianne Roumie (PI), Adriana Hung (Co-I), Kurt Niesner (coordinator), Jennifer Wharton (coordinator). **VA New York Harbor Healthcare System – New York, NY:** Lois Katz (PI), George Brock (coordinator), Elizabeth Richardson (coordinator). **Northport VAMC – Northport, NY:** Troy Dixon (PI), Joanne Holland (Co-I), Athena Zias, (Co-I), Christine Spiller (coordinator). **Phoenix VA Healthcare System – Phoenix, AZ:** James Felicetta (PI), Penelope Baker (Co-I), Shakaib Rehman (Co-I), Penny Carrel (coordinator). **Portland VAMC – Portland, OR:** Suzanne Watnick (PI), Jessica Weiss (Co-I), Tera Johnston (coordinator), Jacqueline Walczyk (coordinator). **St. Louis VA Healthcare System – St. Louis, MO:** Stephen Giddings (PI), Andrew Klein (PI), Caroline Rowe (Co-I), Linda Conwill (coordinator), Kristin Vargo (coordinator), Kristi Waidmann (coordinator). **Washington, D.C. VAMC – Washington, D.C.:** Vasilios Papademetriou (PI), Jean Pierre Elkhoury (Co-I), Susan Amodeo (coordinator), Mary Bloom (coordinator), Barbara Gregory (coordinator), Katherine Hare (coordinator). **West Los Angeles VA Healthcare Center /Greater Los Angeles Healthcare System – Los Angeles, CA:** Dalia Goldfarb-Waysman (PI), Richard Treger (Co-I), Karen Knibloe (coordinator). **Minneapolis VAMC – Minneapolis, MN:** Areef Ishani (PI), Yelena Slinin (Co-I), Christine Olney (coordinator). **Audie L. Murphy Memorial Veterans Hospital – South Texas Veterans Healthcare System – San Antonio, TX:** Paolo Fanti (PI), Shweta Bansal (Co-I), Monica Dunnam (Co-I), Christopher Dyer (Co-I), Lih-Lan Hu (coordinator), Perla Zarate-Abbott (coordinator). **VA CCN Publication Acknowledgments:** The Systolic Blood Pressure Intervention Trial is funded in whole or in part with Federal funds from the National Heart, Lung, and Blood Institute, the National Institute of Diabetes and Digestive and Kidney Diseases, the National Institute on Aging and the National Institute of Neurological Disorders and Stroke, under VA Interagency Agreement Contract Number: **Y1-HV-0514-01.**



## Acknowledgments

The Systolic Blood Pressure Intervention Trial is funded with Federal funds from the National Heart, Lung, and Blood Institute, the National Institute of Diabetes and Digestive and Kidney Diseases, the National Institute on Aging and the National Institute of Neurological Disorders and Stroke, under Contract Numbers: **HHSN268200900040C, HHSN268200900049C, HHSN268200900048C, HHSN268200900046C, HHSN268200900047C, A-HL-13-002-001**. The SPRINT investigators acknowledge the contribution of study medications from Takeda Pharmaceuticals Inc. (azilsartan alone or in combination with chlorthalidone). All components of the SPRINT study protocol were designed and implemented by the investigators. The investigative team collected, analyzed, and interpreted the data. All aspects of manuscript writing and revision were carried out by the coauthors. The content is solely the responsibility of the authors and does not necessarily represent the official views of the NIH.

In addition, the trial is/was supported by the following awards:

**WFU CC Publication Acknowledgement:** Wake Forest University Claude D. Pepper Older Americans Independence Center (P30-AG21332). **CWRU CCN Publication Acknowledgements:** CWRU: **UL1TR000439** (NCATS). **OSU:** **UL1RR025755** (NCRR). **U Penn:** **UL1RR024134** (NCRR) & **UL1TR000003** (NCATS). **UTAH CCN Publication Acknowledgments:** **Boston:** **UL1 RR025771** (CTSA). **Stanford:** **UL1 TR000093** (CTSA) & **UL1 TR000093** (NCATS). **Tufts:** **UL1RR025752** (NCRR) & **UL1 TR000073** and **UL1 TR001064** (NCATS). **University of Illinois:** **UL1TR000050** (CIC). **UT Southwestern:** **9U54TR000017-06** (CTSA). **University of Utah:** **UL1TR000105-05** (CTSA). **Vanderbilt University:** **UL1 TR000445** (NCATS). **University of CA, Davis:** **UL1 TR000002** (CTSA). **University of Florida:** **UL1 TR000064** (NCATS). **University of Michigan:** **UL1TR000433** (MICH). **VA CCN Publication Acknowledgments:** **A-HL-13-002-001** (NHLBI, NIDDK, NIA & NINDS).
